# Supplementary material for: Molecular characterization of IncFII plasmid carrying blaNDM-5 in a Salmonella enterica serovar Typhimurium ST34 clinical isolate in China
Source: PubMed Central journal article supplement (PMC10732066; doi:10.1128/msphere.00480-23), 2023-11-01
Supplement: msphere.00480-23-s0001.pdf [file msphere.00480-23-s0001.pdf]

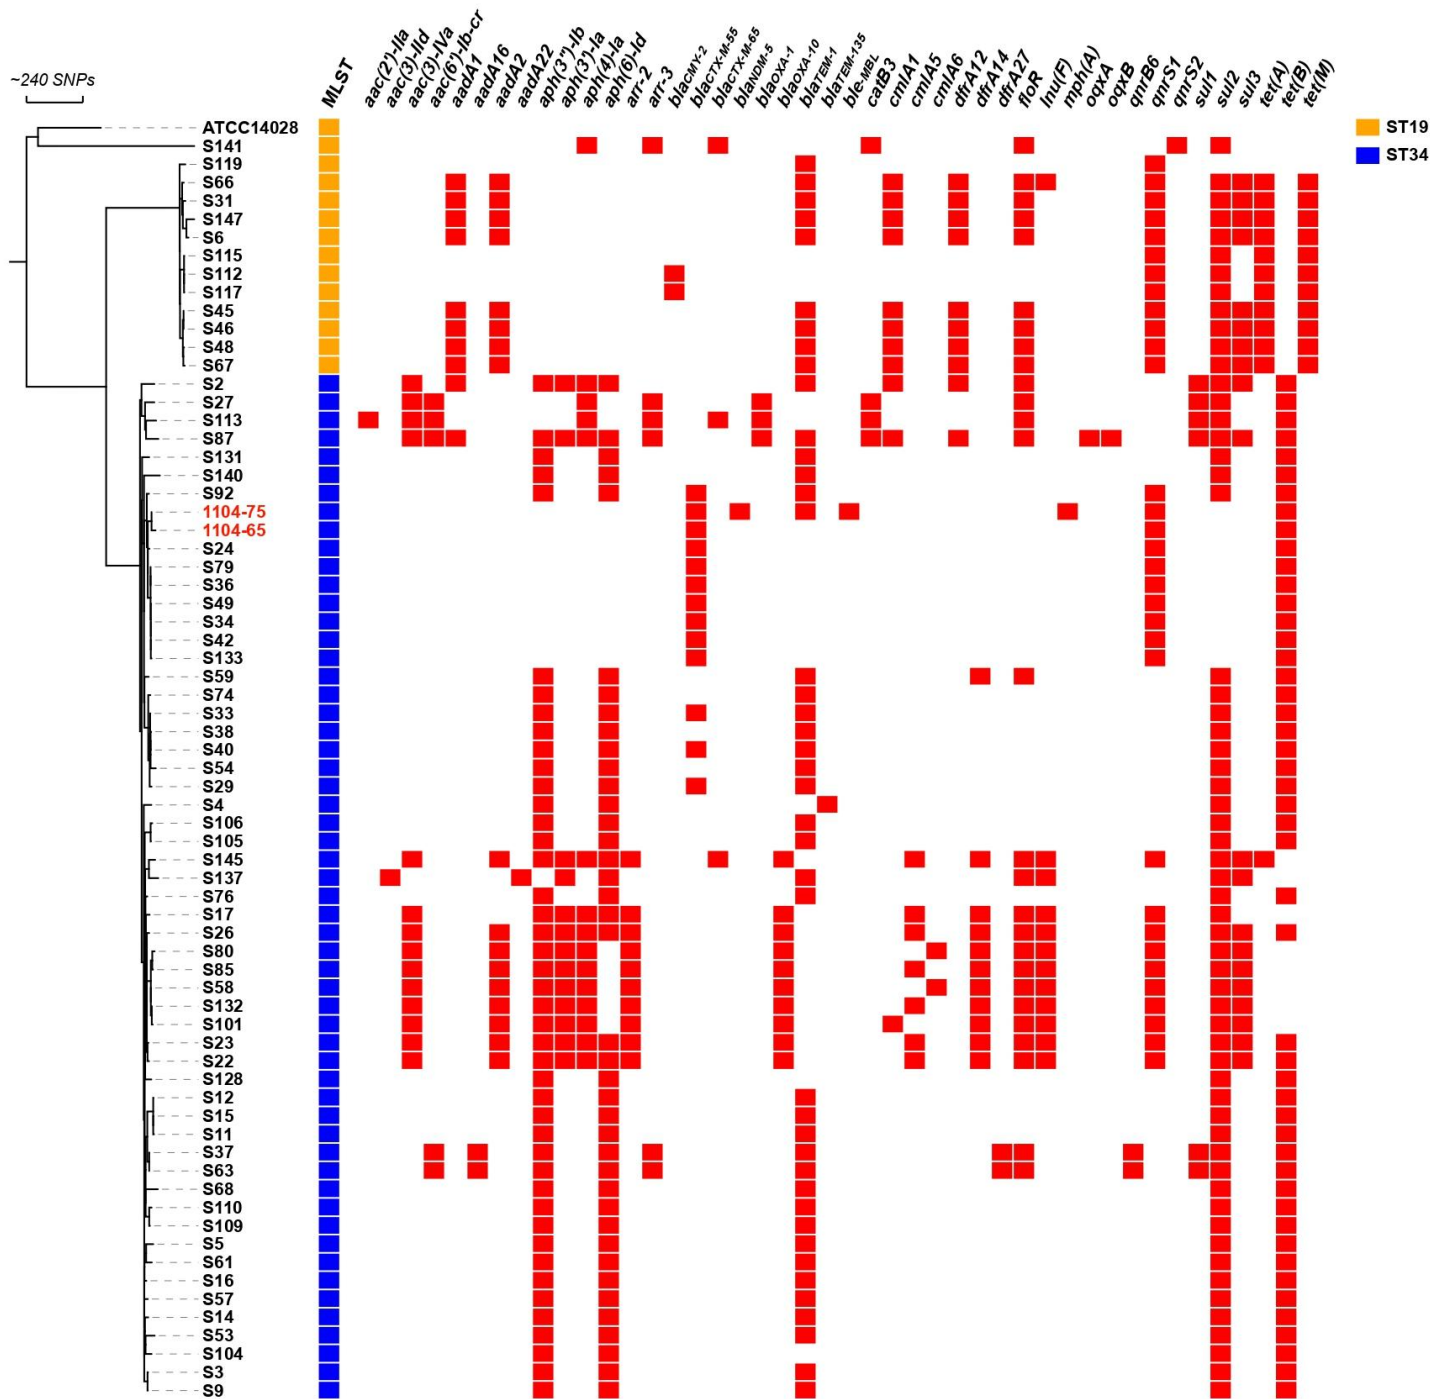

Supplementary Figure 1  
 Phylogenetic analysis  
 between 1104-65,  
 1104-75, ATCC14028,  
 and other *S. enterica*  
 serovar Typhimurium in  
 this area

The red font indicates the strain of this study, the yellow box indicates ST19, and the blue box indicates ST34. Red boxes represent the resistance genes for the different types of antibiotics, while the blank boxes indicate the resistance genes which were not detected.
