# Supplementary material for: Molecular characterization of IncFII plasmid carrying blaNDM-5 in a Salmonella enterica serovar Typhimurium ST34 clinical isolate in China
Source: PubMed Central journal article supplement (PMC10732066; doi:10.1128/msphere.00480-23), 2023-11-01
Supplement: msphere.00480-23-s0002.pdf [file msphere.00480-23-s0002.pdf]

Supplementary Table 1 Information about other 67 strains of *S. enterica* serovar Typhimurium isolated in this area

| Isolates | Serotype    | ST | Isolation date | MIC (mg/L) |        |        |        |        |        | KB (mm) |     |     |     |
|----------|-------------|----|----------------|------------|--------|--------|--------|--------|--------|---------|-----|-----|-----|
|          |             |    |                | SXT        | FEP    | CRO    | CAZ    | IPM    | LVX    | AZM     | AMP | CIP | CHL |
| S2       | Typhimurium | 34 | 2020/5/23      | >=320      | <=0.12 | <=0.25 | 0.5    | <=0.25 | 1      | 22      | 6   | 26  | 6   |
| S3       | Typhimurium | 34 | 2020/5/23      | <=20       | <=0.12 | <=0.25 | 0.25   | <=0.25 | <=0.12 | 24      | 6   | 35  | 31  |
| S4       | Typhimurium | 34 | 2020/5/23      | <=20       | <=0.12 | <=0.25 | 0.25   | <=0.25 | <=0.12 | 24      | 6   | 34  | 32  |
| S5       | Typhimurium | 34 | 2020/5/25      | <=20       | <=0.12 | <=0.25 | 0.25   | <=0.25 | <=0.12 | 23      | 6   | 35  | 29  |
| S6       | Typhimurium | 19 | 2020/5/25      | <=20       | <=0.12 | <=0.25 | 1      | <=0.25 | <=0.12 | 24      | 6   | 36  | 31  |
| S9       | Typhimurium | 34 | 2020/6/3       | <=20       | <=0.12 | <=0.25 | 0.25   | <=0.25 | <=0.12 | 24      | 6   | 35  | 30  |
| S11      | Typhimurium | 34 | 2020/6/5       | <=20       | <=0.12 | <=0.25 | <=0.25 | <=0.25 | <=0.12 | 24      | 6   | 35  | 29  |
| S12      | Typhimurium | 34 | 2020/6/6       | <=20       | <=0.12 | <=0.25 | 0.25   | <=0.25 | <=0.12 | 23      | 6   | 35  | 30  |
| S14      | Typhimurium | 34 | 2020/6/11      | <=20       | <=0.12 | <=0.25 | 0.25   | <=0.25 | <=0.12 | 22      | 6   | 34  | 30  |
| S15      | Typhimurium | 34 | 2020/6/11      | <=20       | <=0.12 | <=0.25 | 0.25   | <=0.25 | <=0.12 | 22      | 6   | 37  | 31  |
| S16      | Typhimurium | 34 | 2020/6/15      | <=20       | <=0.12 | <=0.25 | 0.25   | <=0.25 | <=0.12 | 22      | 6   | 34  | 32  |
| S17      | Typhimurium | 34 | 2020/6/15      | >=320      | <=0.12 | <=0.25 | 0.25   | <=0.25 | 1      | 26      | 9   | 25  | 6   |
| S22      | Typhimurium | 34 | 2020/6/19      | <=20       | <=0.12 | <=0.25 | <=0.12 | <=0.25 | 0.5-   | 23      | 6   | 26  | 6   |
| S23      | Typhimurium | 34 | 2020/6/20      | >=320      | <=0.12 | <=0.25 | 0.25   | <=0.25 | 1      | 24      | 6   | 24  | 6   |
| S24      | Typhimurium | 34 | 2020/6/24      | <=20       | 16     | >=64   | 32     | <=0.25 | 1      | 25      | 6   | 26  | 31  |
| S26      | Typhimurium | 34 | 2020/6/27      | >=320      | <=0.12 | <=0.25 | 0.25   | <=0.25 | 1      | 25      | 6   | 25  | 6   |
| S27      | Typhimurium | 34 | 2020/6/28      | <=20       | <=0.12 | <=0.25 | 0.25   | <=0.25 | 1      | 24      | 6   | 21  | 6   |
| S29      | Typhimurium | 34 | 2020/7/2       | <=20       | 16     | >=64   | >=64   | <=0.25 | <=0.12 | 26      | 6   | 36  | 30  |
| S31      | Typhimurium | 19 | 2020/7/3       | >=320      | <=0.12 | <=0.25 | <=0.12 | <=0.25 | 1      | 26      | 6   | 26  | 6   |
| S33      | Typhimurium | 34 | 2020/7/2       | <=20       | 16     | >=64   | >=64   | <=0.25 | <=0.12 | 25      | 6   | 37  | 32  |
| S34      | Typhimurium | 34 | 2020/7/5       | <=20       | 16     | >=64   | 32     | <=0.25 | 1      | 25      | 6   | 27  | 31  |
| S36      | Typhimurium | 34 | 2020/7/6       | <=20       | 16     | >=64   | 32     | <=0.25 | 1      | 27      | 6   | 28  | 31  |
| S37      | Typhimurium | 34 | 2020/7/5       | >=320      | <=0.12 | <=0.25 | 0.25   | <=0.25 | 1      | 25      | 6   | 21  | 6   |

|      |             |    |           |       |        |        |        |        |        |    |    |    |    |
|------|-------------|----|-----------|-------|--------|--------|--------|--------|--------|----|----|----|----|
| S38  | Typhimurium | 34 | 2020/7/6  | <=20  | <=0.12 | <=0.25 | <=0.12 | <=0.25 | <=0.12 | 24 | 6  | 36 | 32 |
| S40  | Typhimurium | 34 | 2020/7/7  | >=320 | <=0.12 | <=0.25 | 0.25   | <=0.25 | 1      | 25 | 6  | 27 | 6  |
| S42  | Typhimurium | 34 | 2020/7/8  | <=20  | >=32   | >=64   | >=64   | <=0.25 | 1      | 26 | 6  | 25 | 29 |
| S45  | Typhimurium | 19 | 2020/7/10 | >=320 | <=0.12 | <=0.25 | <=0.12 | <=0.25 | 1      | 25 | 6  | 26 | 6  |
| S46  | Typhimurium | 19 | 2020/7/10 | >=320 | <=0.12 | <=0.25 | 0.25   | <=0.25 | 1      | 25 | 6  | 25 | 6  |
| S48  | Typhimurium | 19 | 2020/7/12 | >=320 | <=0.12 | <=0.25 | <=0.12 | 0.5    | 1      | 24 | 6  | 24 | 6  |
| S49  | Typhimurium | 34 | 2020/7/11 | <=20  | 8      | >=64   | 32     | <=0.25 | 1      | 25 | 6  | 25 | 28 |
| S53  | Typhimurium | 34 | 2020/7/14 | <=20  | <=0.12 | <=0.25 | 0.25   | <=0.25 | <=0.12 | 26 | 6  | 34 | 31 |
| S54  | Typhimurium | 34 | 2020/7/15 | <=20  | <=0.12 | <=0.25 | 0.25   | <=0.25 | <=0.12 | 24 | 6  | 37 | 30 |
| S57  | Typhimurium | 34 | 2020/7/17 | <=20  | <=0.12 | <=0.25 | 0.25   | <=0.25 | <=0.12 | 25 | 6  | 35 | 30 |
| S58  | Typhimurium | 34 | 2020/7/17 | >=320 | <=0.12 | <=0.25 | 0.25   | <=0.25 | 1      | 26 | 6  | 25 | 6  |
| S59  | Typhimurium | 34 | 2020/7/17 | >=320 | <=0.12 | <=0.25 | <=0.12 | <=0.25 | <=0.12 | 25 | 6  | 34 | 7  |
| S61  | Typhimurium | 34 | 2020/7/18 | <=20  | <=0.12 | <=0.25 | 0.25   | <=0.25 | <=0.12 | 25 | 6  | 36 | 30 |
| S63  | Typhimurium | 34 | 2020/7/19 | >=320 | <=0.12 | <=0.25 | 0.25   | <=0.25 | 1      | 25 | 6  | 20 | 6  |
| S66  | Typhimurium | 19 | 2020/7/20 | >=320 | <=0.12 | <=0.25 | <=0.12 | <=0.25 | 1      | 24 | 6  | 25 | 6  |
| S67  | Typhimurium | 19 | 2020/7/20 | >=320 | <=0.12 | <=0.25 | <=0.12 | <=0.25 | 1      | 24 | 6  | 26 | 6  |
| S68  | Typhimurium | 34 | 2020/7/22 | <=20  | <=0.12 | <=0.25 | 0.25   | <=0.25 | <=0.12 | 25 | 6  | 34 | 33 |
| S74  | Typhimurium | 34 | 2020/7/28 | <=20  | <=0.12 | <=0.25 | 0.25   | <=0.25 | <=0.12 | 24 | 6  | 34 | 28 |
| S76  | Typhimurium | 34 | 2020/7/30 | <=20  | <=0.12 | <=0.25 | 0.25   | <=0.25 | <=0.12 | 24 | 6  | 25 | 29 |
| S79  | Typhimurium | 34 | 2020/8/10 | <=20  | 8      | >=64   | 32     | <=0.25 | 1      | 26 | 6  | 28 | 30 |
| S80  | Typhimurium | 34 | 2020/8/10 | >=320 | <=0.12 | <=0.25 | 0.5    | <=0.25 | 1      | 24 | 6  | 30 | 6  |
| S85  | Typhimurium | 34 | 2020/8/21 | >=320 | <=0.12 | <=0.25 | 0.25   | <=0.25 | 1      | 23 | 6  | 25 | 6  |
| S87  | Typhimurium | 34 | 2020/8/25 | >=320 | <=0.12 | <=0.25 | 0.25   | <=0.25 | 4      | 24 | 6  | 16 | 6  |
| S92  | Typhimurium | 34 | 2020/9/1  | <=20  | 16     | >=64   | 32     | <=0.25 | 1      | 25 | 6  | 27 | 30 |
| S101 | Typhimurium | 34 | 2020/9/9  | >=320 | <=0.12 | <=0.25 | 0.5    | <=0.25 | 1      | 24 | 6  | 25 | 6  |
| S104 | Typhimurium | 34 | 2020/9/14 | <=20  | <=0.12 | <=0.25 | 0.25   | <=0.25 | <=0.12 | 22 | 23 | 34 | 31 |

|      |             |    |            |       |        |        |        |        |        |    |    |    |    |
|------|-------------|----|------------|-------|--------|--------|--------|--------|--------|----|----|----|----|
| S105 | Typhimurium | 34 | 2020/9/14  | <=20  | <=0.12 | <=0.25 | 0.5    | <=0.25 | <=0.12 | 23 | 6  | 34 | 30 |
| S106 | Typhimurium | 34 | 2020/9/16  | <=20  | <=0.12 | <=0.25 | 0.5    | <=0.25 | <=0.12 | 22 | 6  | 33 | 28 |
| S109 | Typhimurium | 34 | 2020/9/19  | >=320 | 2      | <=0.25 | 4      | <=0.25 | 1      | 22 | 6  | 35 | 32 |
| S110 | Typhimurium | 34 | 2020/9/24  | <=20  | <=0.12 | <=0.25 | 0.5    | <=0.25 | <=0.12 | 25 | 6  | 34 | 29 |
| S112 | Typhimurium | 19 | 2020/9/26  | <=20  | <=0.12 | 32     | 32     | <=0.25 | 1      | 25 | 6  | 25 | 30 |
| S113 | Typhimurium | 34 | 2020/9/28  | <=20  | 2      | >=64   | 4      | <=0.25 | 1      | 25 | 6  | 20 | 6  |
| S115 | Typhimurium | 19 | 2020/9/29  | <=20  | <=0.12 | <=0.25 | 0.25   | <=0.25 | 1      | 26 | 26 | 24 | 31 |
| S117 | Typhimurium | 19 | 2020/10/3  | >=320 | <=0.12 | <=0.25 | 0.5    | <=0.25 | 1      | 26 | 6  | 25 | 31 |
| S119 | Typhimurium | 19 | 2020/10/6  | <=20  | <=0.12 | <=0.25 | 0.25   | <=0.25 | 1      | 27 | 6  | 25 | 28 |
| S128 | Typhimurium | 34 | 2020/10/8  | <=20  | <=0.12 | <=0.25 | 0.25   | <=0.25 | <=0.12 | 24 | 24 | 36 | 28 |
| S131 | Typhimurium | 34 | 2020/10/26 | <=20  | <=0.12 | <=0.25 | <=0.12 | <=0.25 | 1      | 24 | 6  | 26 | 29 |
| S132 | Typhimurium | 34 | 2020/11/1  | >=320 | <=0.12 | <=0.25 | 0.25   | <=0.25 | 1      | 25 | 6  | 26 | 6  |
| S133 | Typhimurium | 34 | 2020/11/5  | <=20  | 8      | >=64   | 32     | <=0.25 | 1      | 25 | 6  | 27 | 30 |
| S137 | Typhimurium | 34 | 2020/11/24 | <=20  | <=0.12 | <=0.25 | 0.5    | <=0.25 | 0.5    | 23 | 6  | 31 | 6  |
| S140 | Typhimurium | 34 | 2020/12/12 | <=20  | <=0.12 | <=0.25 | 0.25   | <=0.25 | 0.5    | 26 | 6  | 30 | 30 |
| S141 | Typhimurium | 19 | 2020/12/24 | <=20  | 2      | >=64   | 4      | <=0.25 | 1      | 25 | 6  | 26 | 6  |
| S145 | Typhimurium | 34 | 2021/2/14  | >=320 | 16     | >=64   | 4      | <=0.25 | 1      | 25 | 6  | 24 | 6  |
| S147 | Typhimurium | 19 | 2021/2/17  | >=320 | <=0.12 | <=0.25 | 0.25   | <=0.25 | 1      | 26 | 6  | 25 | 6  |
